# Supplementary material
Source: ML conference proceedings conference paper supplement (https://openaccess.thecvf.com/content/ICCV2023/html/Liu_HOSNeRF_Dynamic_Human-Object-Scene_ICCV_2023_paper.html)
Supplement: Supplementary file 3 [file Liu_HOSNeRF_Dynamic_Human-Object-Scene_ICCV_2023_supplemental.zip]

Archive with 4 entries (4 files):
- 05040-supp.mp4
- __MACOSX/._05040-supp.mp4
- 05040-supp.pdf
- __MACOSX/._05040-supp.pdf
